# Supplementary material for: Anticancer Activity of Indeno[1,2-b]-Pyridinol Derivative as a New DNA Minor Groove Binding Catalytic Inhibitor of Topoisomerase IIα
Source: PubMed Central journal article supplement — Biomol Ther (Seoul). 2021 May 20;29(5):562–70. doi: 10.4062/biomolther.2020.231 (PMC8411023; doi:10.4062/biomolther.2020.231), 2021-05-20
Supplement: bt-29-5-562-supple.pdf [file bt-29-5-562-supple.pdf]

# Supplementary Materials

## Anticancer Activity of Indeno[1,2-b]-pyridinol Derivative as a New DNA Minor Groove Binding Catalytic Inhibitor of Topoisomerase II $\alpha$

*Kyung-Hwa Jeon<sup>a</sup>, Aarajana Shrestha<sup>b</sup>, Hae Jin Jang<sup>a</sup>, Jung-Ahn Kim<sup>a</sup>, Naeun Sheen<sup>a</sup>,  
Minjung Seo<sup>a</sup>, Eung-Seok Lee<sup>b,\*</sup>, and Youngjoo Kwon<sup>a,\*</sup>*

<sup>a</sup>College of Pharmacy, Graduate School of Pharmaceutical Sciences, Ewha Womans University, 52 Ewhayeodae-gil, Seodaemun-gu, Seoul, 03760, Republic of Korea.

<sup>b</sup>College of Pharmacy, Yeungnam University, Gyeongsan 38541, Republic of Korea

\* Corresponding Authors:

Email: eslee@yu.ac.kr (E.-S.Lee), ykwon@ewha.ac.kr (Y. Kwon)

(A)

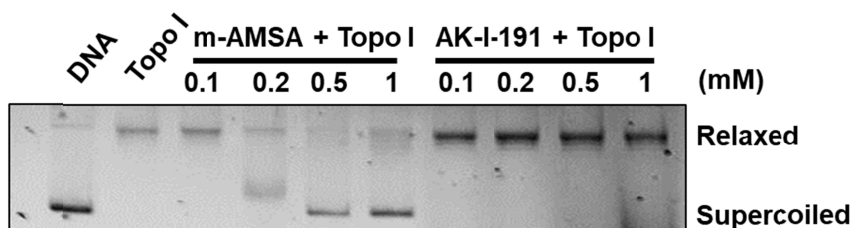

(B)

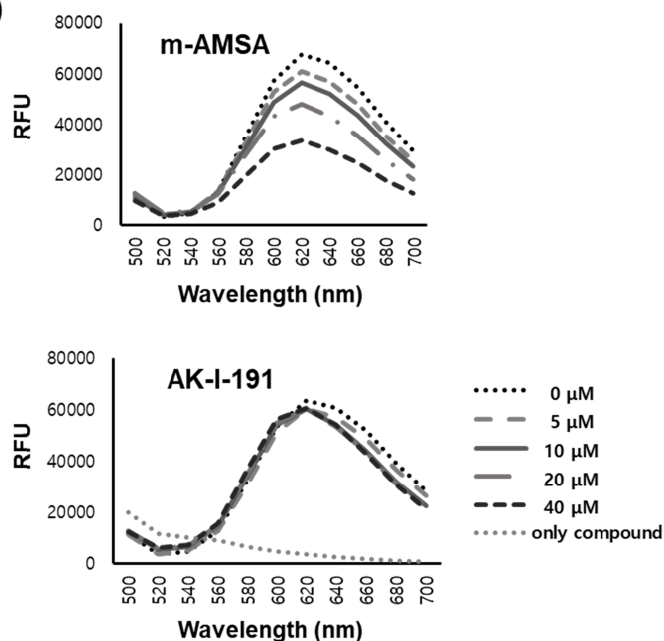

**Supplementary Figure 1. Evaluation of DNA intercalation of AK-I-191.** (A) DNA unwinding assay of AK-I-191. Supercoiled pBR322 DNA 100 ng was relaxed by incubation with 2 units of human DNA topoisomerase I for 30 minutes at 37 °C and m-AMSA or AK-I-191 (100-1000  $\mu$ M in final concentrations) was added and continuously. (B) EtBr displacement assay of AK-I-191. EtBr (20  $\mu$ M) and ctDNA (30  $\mu$ M) were mixed in 96 well plate and incubated for 30 minutes. The mixture was titrated with varying concentrations of m-AMSA (positive control) or AK-I-191. Emission spectra of EB-ctDNA complex were recorded from 500 nm to 700 nm with a fixed excitation in 471 nm.

**Supplementary Table 1. Statistical Evaluation of Kaplan-meier plots in Fig. 4A.**

|                            | 201231_as_at   |                           | 201292_at      |                          |
|----------------------------|----------------|---------------------------|----------------|--------------------------|
|                            | <i>P</i> value | Hazard Ratio<br>[95% CI*] | <i>P</i> value | Hazard Ratio<br>[95% CI] |
| <b>Luminal A</b>           | 0.0082         | 1.883<br>[1.178-3.010]    | 0.0012         | 2.175<br>[1.357-3.485]   |
| <b>Luminal B</b>           | 0.2641         | 1.967<br>[0.6000-6.449]   | 0.3928         | 0.5971<br>[0.1829-1.949] |
| <b>HER2<br/>enriched</b>   | 0.4157         | 0.7796<br>[0.4280-1.420]  | 0.1268         | 0.6270<br>[0.3443-1.142] |
| <b>Triple<br/>Negative</b> | 0.7277         | 1.079<br>[0.7029-1.657]   | 0.0918         | 1.447<br>[0.9417-2.223]  |

\*CI, Confidence interval
